# Supplementary material for: Resistin reinforces interferon λ-3 to eliminate hepatitis C virus with fine-tuning from RETN single-nucleotide polymorphisms
Source: PubMed Central journal article supplement (PMC4967850; doi:10.1038/srep30799), 2016-08-01
Supplement: srep30799-s1.pdf [file srep30799-s1.pdf]

**Resistin reinforces interferon  $\lambda$ -3 to eliminate hepatitis C virus with fine-tuning from RETN single nucleotide polymorphisms**

**Ming-Ling Chang, Kung-Hao Liang, Cheng-Lung Ku, Chia-Chi Lo, Ya-Ting Cheng, Chen-Ming Hsu, Chau-Ting Yeh, Cheng-Tang Chiu**

**Supplementary Figure 1. Flow chart for the enrollment of patients with chronic hepatitis C. HCV: Hepatitis C virus.**

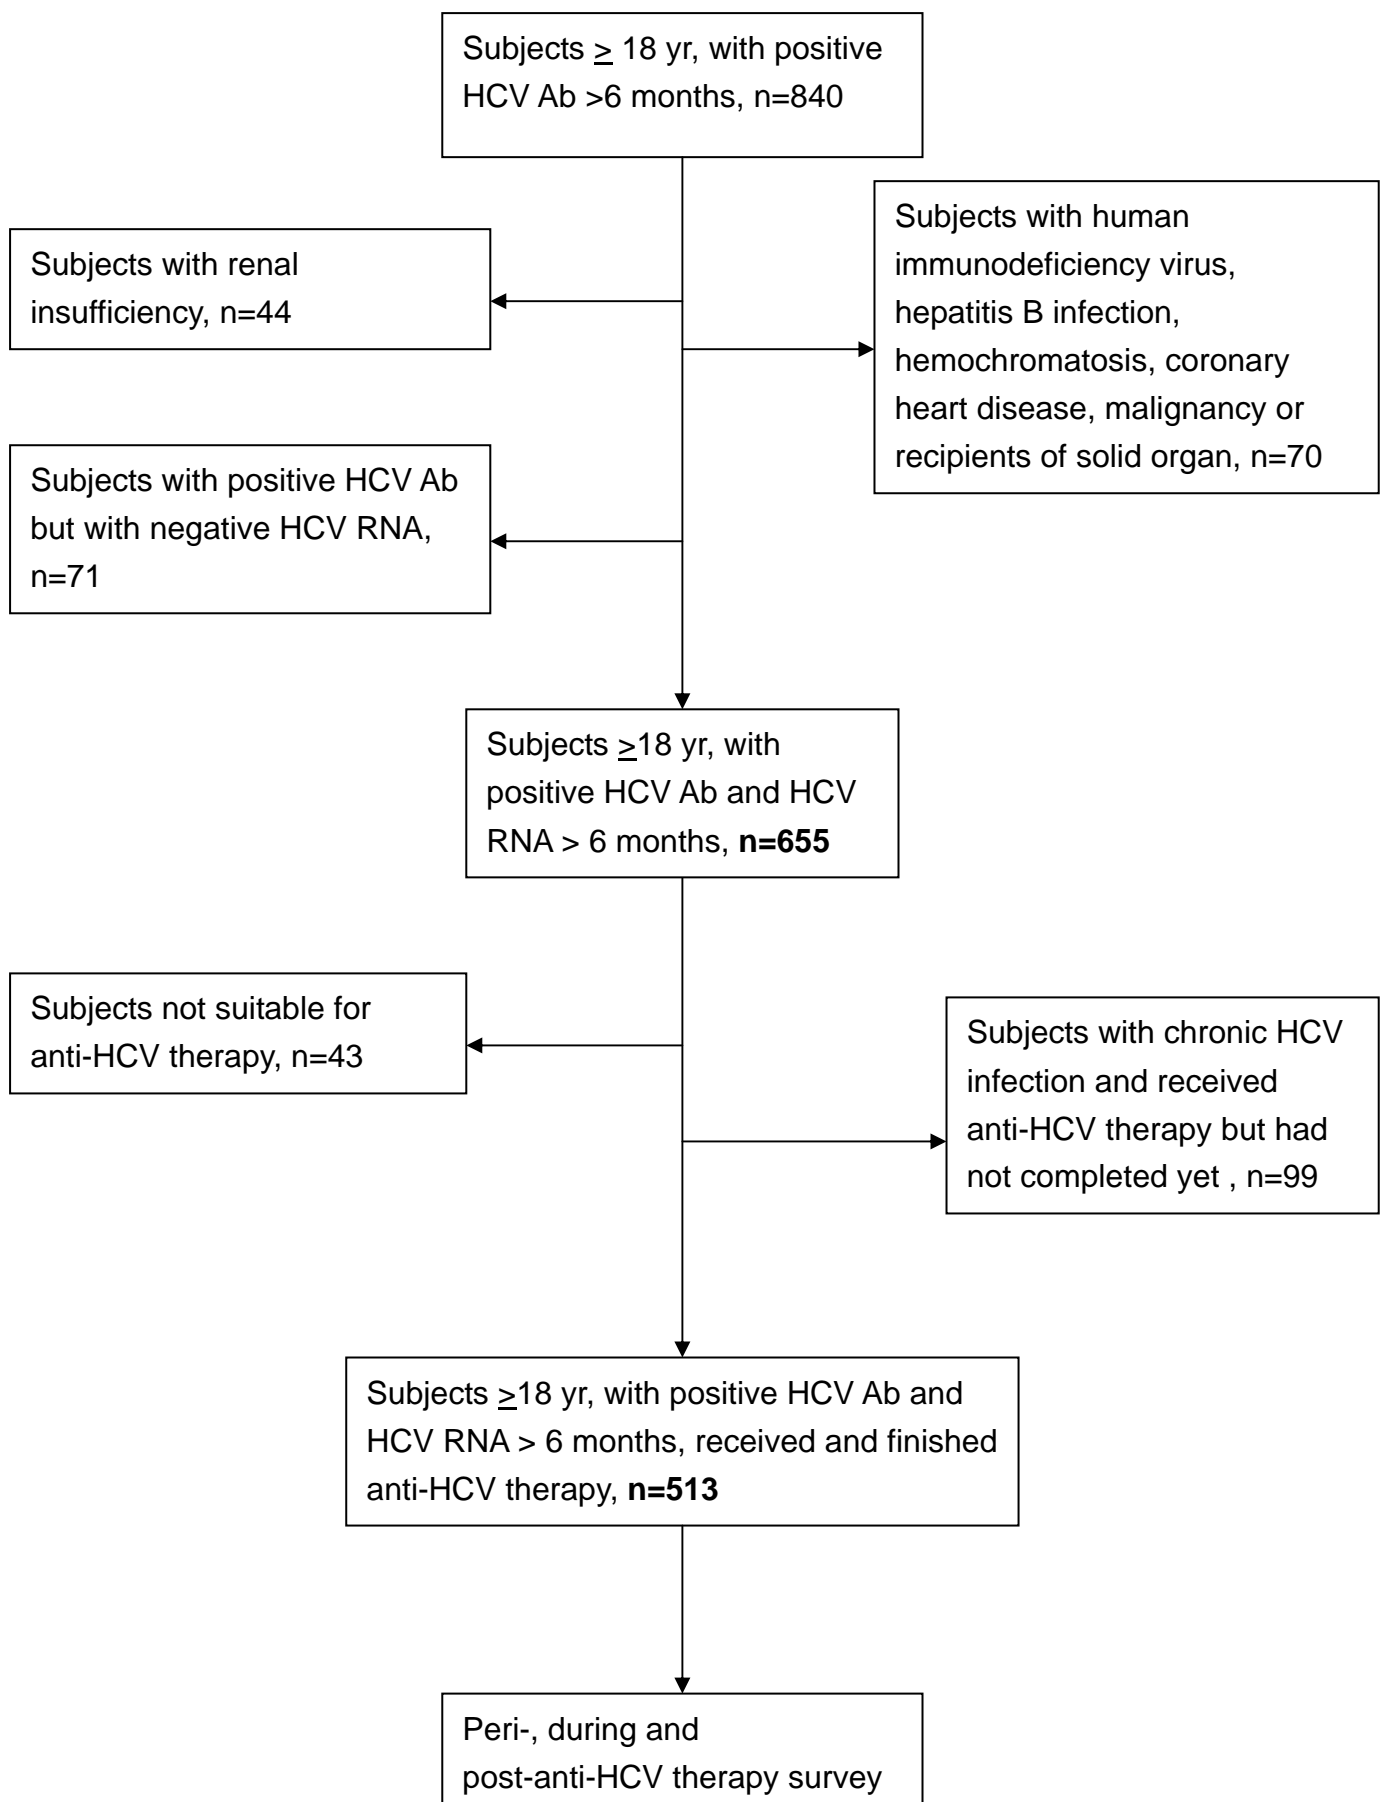

**Supplementary Table 1. The 10 single-nucleotide polymorphisms (SNPs) evaluated in the pilot study.** Among them, the 4 SNPs selected for the subsequent analysis were shown in bold face.

| dbSNP ID          | ID number of TaqMan assays | Chromosome | Location | MAF  | HW <sup>#</sup> | Location in relation to RETN                 |
|-------------------|----------------------------|------------|----------|------|-----------------|----------------------------------------------|
| <b>rs34861192</b> | AHBKFNB                    | 19p13.2    | 7668688  | 0.21 | 0.75            | promoter                                     |
| rs34124816        | C__64386062_10             | 19p13.2    | 7668789  | 0.12 | 0.43            | promoter                                     |
| rs1862513         | C__1394112_10              | 19p13.2    | 7668906  | 0.35 | 0.03            | promoter                                     |
| <b>rs3219175</b>  | C__27472440_10             | 19p13.2    | 7668968  | 0.21 | 0.68            | promoter                                     |
| <b>rs3745367</b>  | C__1394113_10              | 19p13.2    | 7669624  | 0.39 | 0.96            | intron                                       |
| rs3745369         | C__11510413_30             | 19p13.2    | 7670588  | 0.39 | 0.71            | downstream                                   |
| rs1477341         | C__8351534_10              | 19p13.2    | 7671912  | 0.45 | 0.98            | downstream                                   |
| rs4804765         | C__1394116_10              | 19p13.2    | 7672953  | 0.04 | 0.92            | downstream                                   |
| <b>rs1423096</b>  | C__1394117_20              | 19p13.2    | 7674290  | 0.20 | 0.84            | downstream                                   |
| rs10401670        | C__1394125_10              | 19p13.2    | 7677915  | 0.49 | 0.72            | downstream, and overlap with the MCEMP1 gene |

MAF: minor allele frequency

<sup>#</sup> P value of the Chi-square test on the Hardy-Weinberg equilibrium

**Supplementary Table 2. Primer sequences used in the quantitative real time polymerase chain reactions of *resistin (RETN)*, *interferon  $\lambda$ -3 (IFNL3)*, RNA 185S and beta-actin (ACTB). RNA 185S and ACTB served as internal controls.**

| <b>Genes</b>   | <b>Primers</b> | <b>Sequences (5'-&gt;3')</b> |
|----------------|----------------|------------------------------|
| <i>RETN</i>    | Hs-RETN_F      | ACCACATGTCACTGCCAG           |
|                | Hs-RETN_R      | AGGTTTATTTCCAGCTCCCC         |
| <i>RNA185S</i> | Hs-18s-rRNA_F  | GAGACTCTGGCATGCTAACTAG       |
|                | Hs-18s-rRNA_R  | GGACATCTAAGGGCATCACAG        |
| <i>IFNL3</i>   | hsa-IFNL3-F    | AAGGACTGCAAGTGCCGCT          |
|                | hsa-IFNL3-R    | GCTGGTCCAAGACATCCC           |
| <i>ACTB</i>    | Hs-ACTB_F      | ACCTTCTACAATGAGCTGCG         |
|                | Hs-ACTB_R      | CCTGGATAGCAACGTACATGG        |

**Supplementary Table 3. The points for *RETN* score which employs the sum of the hyper-resistinemic genotypes of the 4 *RETN* SNPs.**

| <i>RETN</i> SNP ID | 0 points | 1 points |
|--------------------|----------|----------|
| rs34861192         | GG       | AA or GA |
| rs3219175          | GG       | AA or GA |
| rs3745367          | GG or GA | AA       |
| rs1423096          | CC       | TT or TC |

**Supplementary Table 4. Fold changes and associated *p*-values of interferon  $\lambda$ -3 (IFNL3) or resistin mRNAs in the peripheral blood mononuclear cells (PBMCs) with exposure to recombinant proteins (resistin or IFNL3) compared to the IFNL3 or resistin mRNA of the PBMCs of the same individuals without exposure to recombinant proteins. \*:  $p < 0.05$ .**

| Recombinant proteins | mRNA checked/<br>time points | RETN=0, n=10                                                                                            |                                                                                              | RETN>0, n=10                                                                                            |                                                                                             |
|----------------------|------------------------------|---------------------------------------------------------------------------------------------------------|----------------------------------------------------------------------------------------------|---------------------------------------------------------------------------------------------------------|---------------------------------------------------------------------------------------------|
|                      |                              | Fold changes of mRNAs in PBMCs with recombinant proteins to mRNAs in PBMCs without recombinant proteins | <i>p</i> values of fold changes of mRNAs between PBMCs with and without recombinant proteins | Fold changes of mRNAs in PBMCs with recombinant proteins to mRNAs in PBMCs without recombinant proteins | <i>p</i> values of fold changes of mRNA between PBMCs with and without recombinant proteins |
| IFNL3                | IFNL3/1hr                    | 1.14+/-0.42                                                                                             | 0.234                                                                                        | 1.78+/-0.89                                                                                             | 0.01*                                                                                       |
|                      | IFNL3/2hr                    | 2.11+/-2.52                                                                                             | 0.137                                                                                        | 1.29+/-0.55                                                                                             | 0.02*                                                                                       |
|                      | IFNL3/4 hr                   | 0.96+/-0.38                                                                                             | 0.764                                                                                        | 1.08+/-0.49                                                                                             | 0.455                                                                                       |
| resistin             | IFNL3/1hr                    | 1.09+/-0.41                                                                                             | 0.444                                                                                        | 1.73+/-0.93                                                                                             | <0.01*                                                                                      |
|                      | IFNL3/2hr                    | 2.39+/-4.08                                                                                             | 0.243                                                                                        | 1.21+/-0.53                                                                                             | 0.083                                                                                       |
|                      | IFNL3/4 hr                   | 0.797+/-0.35                                                                                            | 0.062                                                                                        | 0.91+/-0.49                                                                                             | 0.413                                                                                       |
| IFNL3                | Resistin/1hr                 | 0.974+/-0.34                                                                                            | 0.786                                                                                        | 0.99+/-0.38                                                                                             | 0.958                                                                                       |
|                      | Resistin/2hr                 | 1.15+/-0.38                                                                                             | 0.185                                                                                        | 1.03+/-0.42                                                                                             | 0.699                                                                                       |
|                      | Resistin/4 hr                | 1.12+/-0.42                                                                                             | 0.304                                                                                        | 1.07+/-0.31                                                                                             | 0.31                                                                                        |
| resistin             | Resistin/1hr                 | 1.14+/-0.04                                                                                             | 0.233                                                                                        | 1.10+/-0.34                                                                                             | 0.186                                                                                       |
|                      | Resistin/2hr                 | 2.91+/-4.01                                                                                             | 0.111                                                                                        | 1.20+/-2.69                                                                                             | 0.02*                                                                                       |
|                      | Resistin /4 hr               | 1.17+/-0.25                                                                                             | 0.03*                                                                                        | 1.07+/-0.41                                                                                             | 0.414                                                                                       |
